# Supplementary material for: Theoretical study on the effect of N-substitution on the electronic structures and photophysical properties of phosphorescent Ir(iii) complexes
Source: Royal Society of Chemistry journal article supplement (doi:10.1039/c3dt50924a), 2013-01-01
Supplement: c3dt50924a.pdf [file c3dt50924a.pdf]

## Supporting Information

### **Theoretical study on the effect of N-substitution on the electronic structures and photophysical properties of phosphorescent Ir(III) complexes**

Yanling Si<sup>a,b</sup>, Yuqi Liu<sup>a</sup>, Xiaochun Qu<sup>a</sup>, YingWang,<sup>a,\*</sup> and Zhijian Wu<sup>a,\*</sup>

<sup>a</sup> *State Key Laboratory of Rare Earth Resource Utilization, Changchun Institute of Applied Chemistry, Chinese Academy of Sciences, Changchun 130022, P. R. China*

<sup>b</sup> *College of Resource and Environmental Science, Jilin Agricultural University, Changchun 130118, P. R. China*

**Table S1** Optimized geometry parameters for the complex **1** in the ground at PBE0, B3LYP, M062X and BP86 Levels respectively, together with the experimental data

|             | <b>PBE0</b> | <b>B3LYP</b> | <b>M062X</b> | <b>BP86</b> | Exp. <sup>22</sup> |
|-------------|-------------|--------------|--------------|-------------|--------------------|
| Bond Length |             |              |              |             |                    |
| Ir-N1       | 2.040       | 2.065        | 2.060        | 2.055       | 2.031              |
| Ir-C1       | 1.980       | 1.998        | 1.972        | 1.992       | 1.970              |
| Ir-C2       | 1.979       | 1.998        | 1.972        | 1.992       | 1.969              |
| Ir-N2       | 2.040       | 2.065        | 2.060        | 2.051       | 2.027              |
| Ir-O1       | 2.233       | 2.266        | 2.275        | 2.264       | 2.210              |
| Ir-O2       | 2.234       | 2.267        | 2.274        | 2.265       | 2.194              |
| Bond Angle  |             |              |              |             |                    |
| N1-Ir-C1    | 80.9        | 80.6         | 81.0         | 80.9        | 80.6               |
| N1-Ir-C2    | 95.9        | 96.4         | 95.6         | 96.0        | 93.9               |
| N1-Ir-N2    | 175.5       | 175.6        | 175.2        | 175.6       | 172.9              |
| N1-Ir-O1    | 91.7        | 91.6         | 90.9         | 91.0        | 92.2               |
| N1-Ir-O2    | 92.0        | 91.5         | 92.6         | 92.6        | 93.3               |
| C1-Ir-C2    | 92.5        | 93.1         | 90.8         | 93.2        | 93.4               |
| C1-Ir-N2    | 96.1        | 96.4         | 95.6         | 96.1        | 95.4               |
| C1-Ir-O1    | 172.5       | 172.0        | 171.8        | 171.8       | 172.2              |
| C1-Ir-O2    | 89.2        | 89.4         | 90.9         | 88.8        | 87.3               |
| C2-Ir-N2    | 80.8        | 80.6         | 81.0         | 80.9        | 80.4               |
| C2-Ir-O1    | 89.3        | 89.4         | 91.1         | 88.6        | 90.0               |
| C2-Ir-O2    | 172.1       | 172.0        | 171.8        | 171.4       | 172.8              |
| N2-Ir-O1    | 91.3        | 91.5         | 92.6         | 92.1        | 92.1               |
| N2-Ir-O2    | 91.3        | 91.6         | 90.9         | 90.6        | 92.4               |
| O1-Ir-O2    | 90.0        | 89.1         | 88.4         | 90.5        | 90.2               |

**Table S2** Molecular orbital composition (%) of **1** in the ground state

| MO   | Energy<br>(eV) | Compositions (%) |      |         |         | Bond type                                     |
|------|----------------|------------------|------|---------|---------|-----------------------------------------------|
|      |                | Ir               | tpip | tfmppy1 | tfmppy2 |                                               |
| L+5  | -0.68          | 0                | 97   | 1       | 2       | $\pi^*(\text{tpip})$                          |
| L+4  | -0.73          | 0                | 95   | 1       | 4       | $\pi^*(\text{tpip})$                          |
| L+3  | -0.75          | 2                | 5    | 44      | 50      | $\pi^*(\text{tfmppy})$                        |
| L+2  | -0.88          | 3                | 4    | 51      | 42      | $\pi^*(\text{tfmppy})$                        |
| L+1  | -1.42          | 4                | 2    | 39      | 55      | $\pi^*(\text{tfmppy})$                        |
| LUMO | -1.50          | 4                | 2    | 55      | 40      | $\pi^*(\text{tfmppy})$                        |
| HOMO | -5.39          | 45               | 5    | 25      | 25      | $d(\text{Ir})+\pi(\text{tfmppy})$             |
| H-1  | -6.08          | 64               | 13   | 10      | 13      | $d(\text{Ir})+\pi(\text{tpip}+\text{tfmppy})$ |
| H-2  | -6.13          | 66               | 14   | 12      | 8       | $d(\text{Ir})+\pi(\text{tpip}+\text{tfmppy})$ |
| H-3  | -6.46          | 4                | 3    | 46      | 46      | $\pi(\text{tfmppy})$                          |
| H-4  | -6.64          | 2                | 95   | 2       | 1       | $\pi(\text{tpip})$                            |
| H-5  | -6.71          | 4                | 3    | 48      | 45      | $\pi(\text{tfmppy})$                          |

**Table S3** Molecular orbital composition (%) of **2** in the ground state

| MO   | Energy<br>(eV) | Compositions (%) |      |        |        | Bond type                                    |
|------|----------------|------------------|------|--------|--------|----------------------------------------------|
|      |                | Ir               | tpip | dfppy1 | dfppy2 |                                              |
| L+12 | 0.43           | 8                | 5    | 45     | 42     | $\pi^*(\text{dfppy})$                        |
| L+7  | -0.07          | 0                | 99   | 0      | 1      | $\pi^*(\text{tpip})$                         |
| L+5  | -0.53          | 1                | 5    | 41     | 53     | $\pi^*(\text{dfppy})$                        |
| L+4  | -0.65          | 1                | 54   | 34     | 11     | $\pi^*(\text{tpip}+\text{dfppy})$            |
| L+3  | -0.66          | 1                | 44   | 21     | 33     | $\pi^*(\text{tpip}+\text{dfppy})$            |
| L+2  | -0.70          | 0                | 96   | 2      | 2      | $\pi^*(\text{tpip})$                         |
| L+1  | -1.21          | 5                | 2    | 37     | 56     | $\pi^*(\text{dfppy})$                        |
| LUMO | -1.26          | 5                | 3    | 55     | 37     | $\pi^*(\text{dfppy})$                        |
| HOMO | -5.41          | 44               | 5    | 25     | 26     | $d(\text{Ir})+\pi(\text{dfppy})$             |
| H-1  | -6.02          | 48               | 10   | 20     | 23     | $d(\text{Ir})+\pi(\text{tpip}+\text{dfppy})$ |
| H-2  | -6.08          | 57               | 13   | 18     | 13     | $d(\text{Ir})+\pi(\text{tpip}+\text{dfppy})$ |
| H-3  | -6.29          | 19               | 7    | 34     | 40     | $d(\text{Ir})+\pi(\text{dfppy})$             |
| H-4  | -6.35          | 14               | 4    | 43     | 39     | $d(\text{Ir})+\pi(\text{dfppy})$             |
| H-5  | -6.62          | 2                | 85   | 7      | 6      | $\pi(\text{tpip})$                           |

**Table S4** Molecular orbital composition (%) of **1a** in the ground state

| MO   | Energy<br>(eV) | Compositions (%) |      |         |         | Bond type                         |
|------|----------------|------------------|------|---------|---------|-----------------------------------|
|      |                | Ir               | tpip | tfmppy1 | tfmppy2 |                                   |
| L+5  | -0.47          | 0                | 100  | 0       | 0       | $\pi^*(\text{tpip})$              |
| L+4  | -0.52          | 0                | 99   | 0       | 0       | $\pi^*(\text{tpip})$              |
| L+3  | -1.42          | 1                | 0    | 49      | 49      | $\pi^*(\text{tfmppy})$            |
| L+2  | -1.53          | 1                | 1    | 49      | 49      | $\pi^*(\text{tfmppy})$            |
| L+1  | -1.79          | 6                | 1    | 46      | 47      | $\pi^*(\text{tfmppy})$            |
| LUMO | -1.83          | 5                | 1    | 47      | 47      | $\pi^*(\text{tfmppy})$            |
| HOMO | -5.52          | 47               | 6    | 23      | 23      | $d(\text{Ir})+\pi(\text{tfmppy})$ |
| H-1  | -6.18          | 50               | 34   | 8       | 8       | $d(\text{Ir})+\pi(\text{tpip})$   |
| H-2  | -6.20          | 53               | 31   | 8       | 8       | $d(\text{Ir})+\pi(\text{tpip})$   |
| H-3  | -6.45          | 9                | 83   | 4       | 4       | $\pi(\text{tpip})$                |
| H-4  | -6.69          | 3                | 6    | 46      | 46      | $\pi(\text{tfmppy})$              |
| H-5  | -6.79          | 6                | 86   | 4       | 4       | $\pi(\text{tpip})$                |

**Table S5** Molecular orbital composition (%) of **1b** in the ground state

| MO   | Energy<br>(eV) | Compositions (%) |      |         |         | Bond type                                     |
|------|----------------|------------------|------|---------|---------|-----------------------------------------------|
|      |                | Ir               | tpip | tfmppy1 | tfmppy2 |                                               |
| L+5  | -0.70          | 0                | 99   | 0       | 0       | $\pi^*(\text{tpip})$                          |
| L+4  | -0.76          | 0                | 97   | 1       | 1       | $\pi^*(\text{tpip})$                          |
| L+3  | -1.06          | 2                | 1    | 45      | 51      | $\pi^*(\text{tfmppy})$                        |
| L+2  | -1.16          | 3                | 3    | 50      | 44      | $\pi^*(\text{tfmppy})$                        |
| L+1  | -1.89          | 4                | 1    | 44      | 50      | $\pi^*(\text{tfmppy})$                        |
| LUMO | -1.98          | 3                | 1    | 51      | 45      | $\pi^*(\text{tfmppy})$                        |
| HOMO | -5.71          | 46               | 6    | 24      | 24      | $d(\text{Ir})+\pi(\text{tfmppy})$             |
| H-1  | -6.34          | 61               | 20   | 10      | 10      | $d(\text{Ir})+\pi(\text{tpip}+\text{tfmppy})$ |
| H-2  | -6.37          | 61               | 21   | 9       | 9       | $d(\text{Ir})+\pi(\text{tpip})$               |
| H-3  | -6.71          | 3                | 95   | 1       | 1       | $\pi(\text{tpip})$                            |
| H-4  | -6.87          | 2                | 6    | 46      | 46      | $\pi(\text{tfmppy})$                          |
| H-5  | -6.98          | 5                | 91   | 2       | 2       | $\pi(\text{tpip})$                            |
| H-8  | -7.16          | 0                | 42   | 35      | 23      | $\pi(\text{tfmppy}+\text{tpip})$              |
| H-9  | -7.17          | 0                | 75   | 6       | 19      | $\pi(\text{tpip}+\text{tfmppy})$              |
| H-10 | -7.2           | 0                | 98   | 1       | 1       | $\pi(\text{tpip})$                            |
| H-11 | -7.26          | 1                | 77   | 11      | 11      | $\pi(\text{tpip}+\text{tfmppy})$              |
| H-12 | -7.28          | 1                | 60   | 18      | 21      | $\pi(\text{tpip}+\text{tfmppy})$              |

**Table S6** Molecular orbital composition (%) of **1c** in the ground state

| MO   | Energy<br>(eV) | Compositions (%) |      |         |         | Bond type                  |
|------|----------------|------------------|------|---------|---------|----------------------------|
|      |                | Ir               | tpip | tfmppy1 | tfmppy2 |                            |
| L+5  | -0.82          | 0                | 95   | 4       | 1       | $\pi^*$ (tpip)             |
| L+4  | -0.89          | 0                | 95   | 3       | 2       | $\pi^*$ (tpip)             |
| L+3  | -1.19          | 1                | 24   | 30      | 45      | $\pi^*$ (tpip+tfmppy)      |
| L+2  | -1.35          | 2                | 21   | 31      | 46      | $\pi^*$ (tpip+tfmppy)      |
| L+1  | -1.96          | 6                | 14   | 40      | 40      | $\pi^*$ (tpip+tfmppy)      |
| LUMO | -2.01          | 5                | 16   | 39      | 40      | $\pi^*$ (tpip+tfmppy)      |
| HOMO | -5.74          | 44               | 9    | 23      | 24      | d(Ir)+ $\pi$ (tfmppy)      |
| H-1  | -6.50          | 54               | 19   | 13      | 14      | d(Ir)+ $\pi$ (tpip+tfmppy) |
| H-2  | -6.54          | 59               | 21   | 10      | 10      | d(Ir)+ $\pi$ (tpip+tfmppy) |
| H-3  | -6.76          | 4                | 33   | 30      | 33      | $\pi$ (tpip+tfmppy)        |
| H-4  | -6.83          | 7                | 75   | 8       | 10      | $\pi$ (tpip+tfmppy)        |
| H-5  | -6.99          | 4                | 24   | 34      | 38      | $\pi$ (tpip+tfmppy)        |
| H-6  | -7.11          | 9                | 81   | 5       | 5       | $\pi$ (tpip)               |
| H-7  | -7.11          | 2                | 11   | 43      | 44      | $\pi$ (tfmppy)             |

**Table S7** Molecular orbital composition (%) of **1d** in the ground state

| MO   | Energy<br>(eV) | Compositions (%) |      |         |         | Bond type                  |
|------|----------------|------------------|------|---------|---------|----------------------------|
|      |                | Ir               | tpip | tfmppy1 | tfmppy2 |                            |
| L+5  | -0.81          | 0                | 99   | 1       | 1       | $\pi^*$ (tpip)             |
| L+4  | -0.88          | 0                | 98   | 1       | 1       | $\pi^*$ (tpip)             |
| L+3  | -1.30          | 1                | 1    | 46      | 52      | $\pi^*$ (tfmppy)           |
| L+2  | -1.39          | 3                | 1    | 51      | 45      | $\pi^*$ (tfmppy)           |
| L+1  | -1.65          | 5                | 2    | 43      | 50      | $\pi^*$ (tfmppy)           |
| LUMO | -1.71          | 3                | 2    | 51      | 44      | $\pi^*$ (tfmppy)           |
| HOMO | -5.58          | 45               | 5    | 25      | 25      | d(Ir)+ $\pi$ (tfmppy)      |
| H-1  | -6.29          | 61               | 13   | 13      | 13      | d(Ir)+ $\pi$ (tpip+tfmppy) |
| H-2  | -6.33          | 63               | 15   | 11      | 11      | d(Ir)+ $\pi$ (tpip+tfmppy) |
| H-3  | -6.70          | 3                | 3    | 47      | 47      | $\pi$ (tfmppy)             |
| H-4  | -6.79          | 1                | 97   | 1       | 1       | $\pi$ (tpip)               |
| H-5  | -6.96          | 4                | 4    | 53      | 39      | $\pi$ (tfmppy)             |
| H-6  | -7.01          | 4                | 4    | 39      | 53      | $\pi$ (tfmppy)             |

**Table S8** Molecular orbital composition (%) of **2a** in the ground state

| MO   | Energy<br>(eV) | Compositions (%) |      |        |        | Bond type                                    |
|------|----------------|------------------|------|--------|--------|----------------------------------------------|
|      |                | Ir               | tpip | dfppy1 | dfppy2 |                                              |
| L+5  | -0.39          | 0                | 99   | 0      | 0      | $\pi^*(\text{tpip})$                         |
| L+4  | -0.45          | 0                | 99   | 0      | 0      | $\pi^*(\text{tpip})$                         |
| L+3  | -1.19          | 1                | 1    | 58     | 41     | $\pi^*(\text{dfppy})$                        |
| L+2  | -1.27          | 0                | 1    | 41     | 58     | $\pi^*(\text{dfppy})$                        |
| L+1  | -1.64          | 6                | 1    | 85     | 8      | $\pi^*(\text{dfppy})$                        |
| LUMO | -1.65          | 6                | 1    | 8      | 86     | $\pi^*(\text{dfppy})$                        |
| HOMO | -5.54          | 47               | 7    | 23     | 23     | $d(\text{Ir})+\pi(\text{dfppy})$             |
| H-1  | -6.12          | 48               | 25   | 12     | 15     | $d(\text{Ir})+\pi(\text{tpip}+\text{dfppy})$ |
| H-2  | -6.15          | 49               | 28   | 14     | 9      | $d(\text{Ir})+\pi(\text{tpip}+\text{dfppy})$ |
| H-3  | -6.39          | 2                | 83   | 7      | 8      | $\pi(\text{tpip})$                           |
| H-4  | -6.58          | 4                | 15   | 31     | 51     | $\pi(\text{tpip}+\text{dfppy})$              |
| H-5  | -6.60          | 11               | 15   | 48     | 25     | $\pi(\text{tpip}+\text{dfppy})$              |

**Table S9** Molecular orbital composition (%) of **2b** in the ground state

| MO   | Energy<br>(eV) | Compositions (%) |      |        |        | Bond type                                    |
|------|----------------|------------------|------|--------|--------|----------------------------------------------|
|      |                | Ir               | tpip | dfppy1 | dfppy2 |                                              |
| L+5  | -0.67          | 0                | 99   | 0      | 0      | $\pi^*(\text{tpip})$                         |
| L+4  | -0.72          | 0                | 97   | 2      | 1      | $\pi^*(\text{tpip})$                         |
| L+3  | -0.88          | 2                | 1    | 41     | 56     | $\pi^*(\text{dfppy})$                        |
| L+2  | -0.97          | 3                | 3    | 54     | 40     | $\pi^*(\text{dfppy})$                        |
| L+1  | -1.67          | 4                | 2    | 41     | 52     | $\pi^*(\text{dfppy})$                        |
| LUMO | -1.72          | 4                | 2    | 52     | 42     | $\pi^*(\text{dfppy})$                        |
| HOMO | -5.74          | 46               | 6    | 24     | 24     | $d(\text{Ir})+\pi(\text{dfppy})$             |
| H-1  | -6.30          | 57               | 19   | 10     | 14     | $d(\text{Ir})+\pi(\text{tpip}+\text{dfppy})$ |
| H-2  | -6.34          | 58               | 21   | 13     | 8      | $d(\text{Ir})+\pi(\text{tpip}+\text{dfppy})$ |
| H-3  | -6.67          | 0                | 62   | 20     | 18     | $\pi(\text{tpip}+\text{dfppy})$              |
| H-4  | -6.73          | 5                | 14   | 64     | 17     | $\pi(\text{dfppy})$                          |
| H-5  | -6.74          | 6                | 27   | 8      | 59     | $\pi(\text{tpip}+\text{dfppy})$              |
| H-6  | -6.94          | 3                | 45   | 24     | 28     | $\pi(\text{tpip}+\text{dfppy})$              |
| H-7  | -6.95          | 4                | 49   | 26     | 20     | $\pi(\text{tpip}+\text{dfppy})$              |
| H-8  | -7.04          | 1                | 96   | 1      | 2      | $\pi(\text{tpip})$                           |
| H-9  | -7.11          | 0                | 98   | 1      | 0      | $\pi(\text{tpip})$                           |

**Table S10** Molecular orbital composition (%) of **2c** in the ground state

| MO   | Energy<br>(eV) | Compositions (%) |      |        |        | Bond type                 |
|------|----------------|------------------|------|--------|--------|---------------------------|
|      |                | Ir               | tpip | dfppy1 | dfppy2 |                           |
| L+6  | -0.22          | 1                | 98   | 1      | 0      | $\pi^*$ (tpip)            |
| L+5  | -0.79          | 0                | 98   | 1      | 1      | $\pi^*$ (tpip)            |
| L+4  | -0.85          | 0                | 98   | 1      | 1      | $\pi^*$ (tpip)            |
| L+3  | -0.96          | 1                | 8    | 46     | 45     | $\pi^*$ (dfppy)           |
| L+2  | -1.08          | 1                | 6    | 50     | 43     | $\pi^*$ (dfppy)           |
| L+1  | -1.79          | 6                | 8    | 44     | 43     | $\pi^*$ (dfppy)           |
| LUMO | -1.83          | 6                | 8    | 48     | 38     | $\pi^*$ (dfppy)           |
| HOMO | -5.76          | 42               | 7    | 26     | 25     | d(Ir)+ $\pi$ (dfppy)      |
| H-1  | -6.38          | 28               | 11   | 31     | 29     | d(Ir)+ $\pi$ (dfppy)      |
| H-2  | -6.45          | 37               | 15   | 25     | 23     | d(Ir)+ $\pi$ (tpip+dfppy) |
| H-3  | -6.65          | 28               | 27   | 23     | 22     | d(Ir)+ $\pi$ (tpip+dfppy) |
| H-4  | -6.69          | 27               | 15   | 30     | 28     | d(Ir)+ $\pi$ (tpip+dfppy) |
| H-5  | -6.81          | 8                | 84   | 4      | 4      | $\pi$ (tpip)              |

**Table S11** Molecular orbital composition (%) of **2d** in the ground state

| MO   | Energy<br>(eV) | Compositions (%) |      |        |        | Bond type            |
|------|----------------|------------------|------|--------|--------|----------------------|
|      |                | Ir               | tpip | dfppy1 | dfppy2 |                      |
| L+6  | -0.21          | 1                | 98   | 1      | 0      | $\pi^*$ (tpip)       |
| L+5  | -0.78          | 0                | 97   | 1      | 1      | $\pi^*$ (tpip)       |
| L+4  | -0.84          | 0                | 97   | 1      | 1      | $\pi^*$ (tpip)       |
| L+3  | -1.11          | 1                | 3    | 48     | 49     | $\pi^*$ (dfppy)      |
| L+2  | -1.20          | 1                | 2    | 49     | 48     | $\pi^*$ (dfppy)      |
| L+1  | -1.45          | 5                | 2    | 45     | 47     | $\pi^*$ (dfppy)      |
| LUMO | -1.48          | 5                | 3    | 47     | 45     | $\pi^*$ (dfppy)      |
| HOMO | -5.60          | 44               | 5    | 25     | 25     | d(Ir)+ $\pi$ (dfppy) |
| H-1  | -6.20          | 47               | 10   | 21     | 22     | d(Ir)+ $\pi$ (dfppy) |
| H-2  | -6.24          | 48               | 12   | 21     | 20     | d(Ir)+ $\pi$ (dfppy) |
| H-3  | -6.57          | 19               | 6    | 37     | 38     | d(Ir)+ $\pi$ (dfppy) |
| H-4  | -6.59          | 16               | 8    | 38     | 37     | d(Ir)+ $\pi$ (dfppy) |
| H-5  | -6.69          | 2                | 6    | 46     | 46     | $\pi$ (dfppy)        |

**Table S12** Selected calculated wavelength (nm)/energies (eV), oscillator strength (*f*), major contribution and transition characters for **1-1d** and **2-2d** in CH<sub>2</sub>Cl<sub>2</sub> media

|                 | state           | $\lambda_{\text{cal}}/\text{E}$ | <i>f</i>       | configuration   | nature         | Exp. <sup>22</sup> |
|-----------------|-----------------|---------------------------------|----------------|-----------------|----------------|--------------------|
| <b>1</b>        | S <sub>1</sub>  | 486/2.55                        | 0.0530         | H->L (96%)      | MLCT/ ILCT     | 464                |
|                 | S <sub>3</sub>  | 394/3.14                        | 0.0021         | H-2->L (60%)    | MLCT/ILCT/LLCT | 412                |
|                 |                 |                                 |                | H-1->L (35%)    | MLCT/ILCT/LLCT |                    |
|                 | S <sub>7</sub>  | 349/3.55                        | 0.0358         | H-2->L+1 (91%)  | MLCT/ILCT/LLCT | 350                |
|                 | S <sub>27</sub> | 277/4.48                        | 0.1107         | H-5->L+1 (23%)  | ILCT           |                    |
|                 |                 |                                 |                | H-2->L+3 (16%)  | MLCT/ILCT/LLCT |                    |
|                 |                 |                                 |                | H-2->L+4 (10%)  | MLCT/LLCT/ILCT |                    |
|                 | <b>2</b>        | S <sub>1</sub>                  | 403/3.07       | 0.0379          | H->L(95%)      | MLCT/ILCT          |
| S <sub>19</sub> |                 | 278/4.46                        | 0.1440         | H-5->L+1 (15%)  | LLCT           |                    |
|                 |                 |                                 |                | H-1->L+4 (14%)  | MLCT/LLCT/ILCT |                    |
| S <sub>29</sub> |                 | 268/4.63                        | 0.1756         | H-1->L+5 (25%)  | MLCT/ILCT/LLCT |                    |
|                 |                 |                                 |                | H->L+7 (12%)    | MLCT/LLCT      |                    |
| S <sub>50</sub> |                 | 248/4.99                        | 0.0034         | H->L+12 (29%)   | MLCT/ILCT      |                    |
|                 |                 |                                 |                | H-4->L+2 (46%)  | MLCT/ILCT      | 240                |
|                 | H-4->L+3 (13%)  |                                 |                | MLCT/LLCT/ILCT  |                |                    |
| <b>1a</b>       | S <sub>1</sub>  | 473/2.62                        | 0.0152         | H-3->L+4 (21%)  | MLCT/LLCT/ILCT |                    |
|                 |                 |                                 |                | H->L (97%)      | MLCT/ILCT      |                    |
|                 |                 |                                 |                | H-2->L (47%)    | MLCT/ILCT      |                    |
| <b>1b</b>       | S <sub>1</sub>  | 464/2.67                        | 0.0498         | H-1->L+1 (49%)  | MLCT/ILCT      |                    |
|                 |                 |                                 |                | H->L (97%)      | MLCT/ILCT      |                    |
|                 | S <sub>27</sub> | 280/4.43                        | 0.1351         | H-9->L (37%)    | MLCT/ILCT      |                    |
|                 |                 |                                 |                | H-8->L+1 (18%)  | MLCT/LLCT      |                    |
|                 | S <sub>30</sub> | 277/4.48                        | 0.1010         | H-12->L (21%)   | LLCT/ILCT      |                    |
|                 |                 |                                 |                | H-11->L+1 (15%) | LLCT/ILCT      |                    |
| <b>1c</b>       | S <sub>1</sub>  | 473/2.62                        | 0.0260         | H-10->L (17%)   | LLCT           |                    |
|                 |                 |                                 |                | H-9->L+1 (21%)  | LLCT/ILCT      |                    |
|                 |                 |                                 |                | H->L (97%)      | MLCT/ILCT      |                    |
|                 | S <sub>6</sub>  | 361/3.43                        | 0.1346         | H-2->L (32%)    | MLCT/LLCT/ILCT |                    |
|                 |                 |                                 |                | H-1->L+1 (34%)  | MLCT/ILCT/LLCT |                    |
|                 |                 |                                 |                | H->L+2 (30%)    | MLCT/ILCT/LLCT |                    |
| S <sub>27</sub> | 287/4.32        | 0.1377                          | H-7->L+1 (29%) | ILCT/LLCT       |                |                    |
|                 |                 |                                 | H-6->L (20%)   | LLCT/ILCT       |                |                    |
|                 |                 |                                 | H-1->L+3 (17%) | MLCT/ILCT/LLCT  |                |                    |
| <b>1d</b>       | S <sub>1</sub>  | 441/2.81                        | 0.0435         | H->L (95%)      | MLCT/ILCT      |                    |
|                 | S <sub>21</sub> | 280/4.42                        | 0.1049         | H-6->L (65%)    | ILCT           |                    |
| <b>2a</b>       | S <sub>1</sub>  | 446/2.78                        | 0.0078         | HOMO->L (79%)   | MLCT/ILCT      |                    |
|                 |                 |                                 |                | H->L+1 (18%)    | MLCT/ILCT      |                    |
| <b>2b</b>       | S <sub>7</sub>  | 357/3.47                        | 0.1913         | H-2->L (42%),   | MLCT/LLCT/ILCT |                    |
|                 |                 |                                 |                | H-2->L+1 (12%), | MLCT/LLCT/ILCT |                    |



|           |                 |          |        |                                                      |                                               |
|-----------|-----------------|----------|--------|------------------------------------------------------|-----------------------------------------------|
|           |                 |          |        | H-1->L (11%),<br>H-1->L+1 (27%)                      | MLCT/ILCT/LLCT<br>MLCT/ILCT/LLCT              |
|           | S <sub>17</sub> | 301/4.11 | 0.1006 | H-5->L (16%),<br>H-4->L+1 (54%)                      | ILCT/LLCT/MLCT<br>ILCT/LLCT                   |
| <b>2b</b> | S <sub>1</sub>  | 427/2.90 | 0.0436 | H->L (96%)                                           | ILCT/MLCT                                     |
|           | S <sub>23</sub> | 283/4.38 | 0.1953 | H-4->L+1 (11%),<br>H-2->L+2 (16%),<br>H-1->L+3 (18%) | ILCT/LLCT<br>MLCT/LLCT/ILCT<br>MLCT/ILCT/LLCT |
|           | S <sub>25</sub> | 279/4.44 | 0.1094 | H-9->L (26%),<br>H-8->L+1 (14%)                      | LLCT<br>LLCT                                  |
| <b>2c</b> | S <sub>1</sub>  | 446/2.78 | 0.0201 | H->L (97%)                                           | MLCT/ILCT                                     |
|           | S <sub>27</sub> | 282/4.39 | 0.1645 | H-1->L+3 (62%)                                       | MLCT/ILCT /LLCT                               |
|           | S <sub>45</sub> | 260/4.77 | 0.1591 | H-3->L+3 (48%),<br>H->L+6 (18%)                      | MLCT/ILCT /LLCT<br>MLCT/LLCT                  |
| <b>2d</b> | S <sub>1</sub>  | 411/3.02 | 0.0294 | H->L (96%)                                           | MLCT/ILCT                                     |
|           | S <sub>7</sub>  | 339/3.66 | 0.1147 | H-2->L (50%),<br>H-1->L+1 (45%)                      | MLCT/ILCT/LLCT<br>MLCT/ILCT/LLCT              |
|           | S <sub>21</sub> | 286/4.34 | 0.1896 | H-5->L+1 (62%),<br>H-4->L (12%)                      | ILCT<br>MLCT/ILCT                             |

**Table S13** Calculated phosphorescent emission wavelength (nm)/energies (eV), of the complexes **1** and **2** in CH<sub>2</sub>Cl<sub>2</sub> media with the TDDFT method at the B3LYP, M062X and PBE0 level, respectively, together with the experimental values

|          | $\lambda_{\text{cal}}/E(\text{eV})$<br>(M062X) | $\lambda_{\text{cal}}/E(\text{eV})$<br>(B3LYP) | $\lambda_{\text{cal}}/E(\text{eV})$<br>(PBE0) | Exp. <sup>22</sup> |
|----------|------------------------------------------------|------------------------------------------------|-----------------------------------------------|--------------------|
| <b>1</b> | 496/2.50                                       | 594/2.08                                       | 598/ 2.07                                     | 524                |
| <b>2</b> | 472/2.63                                       | 544/2.28                                       | 551/2.25                                      | 485                |

**Table S14** Optimized S<sub>0</sub> structure for Ir(tfmppp)<sub>2</sub>(tpip) (1)

|    |             |             |             |   |             |             |             |
|----|-------------|-------------|-------------|---|-------------|-------------|-------------|
| Ir | 0.69045400  | 0.01294100  | -0.02144800 | C | 0.91298500  | -0.41523100 | -4.79861100 |
| P  | -2.32843500 | 1.41914200  | -0.45043900 | H | 0.98773500  | -0.48800700 | -5.87987000 |
| P  | -2.38563300 | -1.20902900 | 0.64559700  | C | -3.11132800 | 5.28535700  | 0.60562100  |
| N  | 0.73310800  | -0.22471000 | -2.04690600 | H | -2.55302100 | 6.21464900  | 0.68209900  |
| C  | -3.56275100 | 0.48761600  | -2.79199200 | C | 1.77334200  | -0.53370800 | 4.03522700  |
| H  | -4.16134200 | -0.12837200 | -2.12623400 | H | 2.43265000  | -1.22476300 | 4.54874500  |
| N  | 0.80708900  | 0.24948000  | 2.00157600  | C | -5.57732700 | -3.42331400 | -0.66067100 |
| C  | 2.00706100  | -1.40812600 | 0.38618600  | H | -6.65117600 | -3.29230200 | -0.76562400 |
| C  | -2.46157800 | -1.38521900 | 2.45283800  | C | 0.25024300  | 1.31741400  | 4.05923000  |
| O  | -0.82702800 | 1.64161500  | -0.19166800 | H | -0.30860000 | 2.09106200  | 4.57404000  |
| C  | 2.64238300  | -2.27881100 | -0.50506100 | C | -4.53797000 | 2.89666900  | 0.42784300  |
| H  | 2.46241100  | -2.18962100 | -1.57202200 | H | -5.08089900 | 1.95703100  | 0.37284300  |
| C  | -3.41546200 | -2.54853200 | -0.02183200 | C | -3.39995800 | -0.75911300 | 4.59097600  |
| O  | -0.94914600 | -1.49207100 | 0.17204900  | H | -4.07527800 | -0.14059600 | 5.17657600  |
| C  | 2.10879600  | 1.32106700  | -0.46205200 | C | -4.79787200 | -2.38688500 | -0.15618100 |
| C  | 1.62808500  | -0.61949800 | 2.64935500  | H | -5.25357600 | -1.44112400 | 0.12571100  |
| C  | 3.51138900  | -3.26831200 | -0.05091500 | C | 0.02851400  | -1.22699100 | -4.09260400 |
| C  | -3.17949000 | 2.92272800  | 0.09925900  | H | -0.61117000 | -1.94453400 | -4.59419000 |
| N  | -3.07870000 | 0.18928100  | 0.26093400  | C | -2.82163300 | -3.75706700 | -0.39759300 |
| C  | 2.37848000  | 1.45944000  | -1.84706600 | H | -1.74517400 | -3.87286200 | -0.30305400 |
| C  | -2.58022400 | 1.32091100  | -2.25090100 | C | -4.46651000 | 5.25602800  | 0.92640900  |
| C  | 3.78367100  | 3.03710500  | -0.05874400 | H | -4.96800200 | 6.16456200  | 1.24970000  |
| C  | 1.60466000  | 0.57694700  | -2.71495200 | C | -5.17880800 | 4.06110600  | 0.83900700  |
| C  | 2.84157900  | 2.12818000  | 0.41524300  | H | -6.23453700 | 4.03672300  | 1.09629900  |
| H  | 2.68282000  | 2.04935600  | 1.48597300  | C | 1.08118900  | 0.43509700  | 4.74520200  |
| C  | 3.78183700  | -3.41837700 | 1.31002700  | H | 1.19142500  | 0.50445900  | 5.82357800  |
| H  | 4.46570900  | -4.18863600 | 1.64967500  | F | 5.21871000  | -4.81676700 | -0.57092800 |
| C  | -3.32916700 | -0.59389200 | 3.21039800  | C | -2.60409400 | -1.71335900 | 5.22058500  |
| H  | -3.93095300 | 0.15854900  | 2.70781000  | H | -2.66103400 | -1.84312800 | 6.29840000  |
| C  | 4.03109200  | 3.16866300  | -1.42692100 | F | 4.44708400  | -3.60306000 | -2.19003600 |
| H  | 4.77416000  | 3.87456500  | -1.78258200 | F | 3.24904300  | -5.20009300 | -1.37190200 |
| C  | 2.29980400  | -1.56705400 | 1.76497900  | C | -1.73166000 | -2.50002400 | 4.47002200  |
| C  | -1.66052700 | -2.33892500 | 3.08983900  | H | -1.10454900 | -3.23923700 | 4.96155600  |
| H  | -0.97126300 | -2.93927300 | 2.50163800  | C | -3.60383600 | -4.79179800 | -0.90419600 |
| C  | 3.17448900  | -2.56141200 | 2.21457800  | H | -3.13699300 | -5.72754600 | -1.20028500 |
| H  | 3.39104900  | -2.67374500 | 3.27392600  | C | -4.98084400 | -4.62659500 | -1.03399800 |
| C  | -0.03085100 | -1.10079700 | -2.71468500 | H | -5.59031000 | -5.43516000 | -1.42911700 |
| H  | -0.69022700 | -1.69818200 | -2.09374100 | C | 4.11203100  | -4.21873300 | -1.04329300 |
| C  | -2.46762600 | 4.12229700  | 0.19103800  | F | 5.72013300  | 4.27997800  | 0.46324300  |
| H  | -1.40710900 | 4.13116400  | -0.04596900 | F | 3.82341800  | 5.07805500  | 1.11731400  |
| C  | -1.78998200 | 2.10016700  | -3.10327500 | C | -1.98430900 | 2.04683400  | -4.47945700 |
| H  | -1.01320700 | 2.73314600  | -2.68251000 | H | -1.36549600 | 2.65127600  | -5.13746400 |

|   |             |            |             |   |             |             |             |
|---|-------------|------------|-------------|---|-------------|-------------|-------------|
| C | 3.32656500  | 2.37473100 | -2.31713000 | C | -3.75462600 | 0.43467400  | -4.17046700 |
| H | 3.52542500  | 2.47150400 | -3.38146300 | H | -4.51786100 | -0.21817400 | -4.58605900 |
| C | 1.70309600  | 0.48811500 | -4.10503000 | C | -2.96819700 | 1.21573900  | -5.01373700 |
| H | 2.40411500  | 1.12441500 | -4.63396900 | H | -3.12027700 | 1.17658900  | -6.08946000 |
| C | 0.14120900  | 1.19149600 | 2.68423800  | C | 4.50027000  | 3.93188000  | 0.90814700  |
| H | -0.47858700 | 1.84279100 | 2.07686000  | F | 4.66175800  | 3.35406800  | 2.11017500  |

**Table S15** Optimized  $S_0$  structure for Ir(dfppy)<sub>2</sub>(tpip) (**2**)

|   |             |             |             |    |             |             |             |
|---|-------------|-------------|-------------|----|-------------|-------------|-------------|
| C | 1.27832800  | 3.87418000  | 0.16919200  | C  | -3.89978500 | 1.91559300  | -2.53933900 |
| H | 0.56031300  | 3.79550800  | -0.64294800 | C  | -1.92950500 | -2.49951300 | -1.23767400 |
| C | 1.48420800  | -3.72339300 | -0.37136600 | C  | -3.12259700 | -1.00115700 | 1.95587900  |
| H | 0.72125600  | -3.80727800 | 0.39806500  | H  | -2.96499000 | -0.12118900 | 2.56966500  |
| C | 2.11229400  | 2.78960200  | 0.46049600  | C  | -2.65836800 | 2.33156100  | -0.09785700 |
| C | 3.01561900  | 2.87799100  | 1.52316000  | C  | -2.09761900 | 3.47935800  | 2.12121800  |
| H | 3.64145400  | 2.02061700  | 1.75564800  | H  | -2.76253400 | 4.30643000  | 1.91658700  |
| C | 5.17146400  | 1.71913900  | -3.16266300 | C  | -2.02398300 | -3.52299500 | -2.18817900 |
| H | 6.24418100  | 1.54438000  | -3.15529800 | H  | -2.71054600 | -4.34075300 | -2.02077900 |
| C | 4.55499400  | 2.22982300  | -4.30369300 | C  | -1.96938800 | 2.45130300  | 1.18003000  |
| H | 5.14775600  | 2.45503400  | -5.18647800 | C  | 3.03259900  | 1.64906200  | -2.03713600 |
| C | -2.41984200 | -1.19965700 | 0.76410200  | C  | 2.63711100  | -4.63042400 | -2.28657100 |
| C | 2.89448300  | -1.75016400 | 2.26358000  | H  | 2.78500500  | -5.43712400 | -3.00015600 |
| C | 1.35141000  | 5.03542500  | 0.93208000  | C  | 2.20491400  | -2.45835100 | 3.25211000  |
| H | 0.69648800  | 5.87292800  | 0.70669200  | H  | 1.14550900  | -2.66100200 | 3.12004800  |
| C | -2.36865000 | 1.15337900  | -0.84396900 | C  | -4.19453800 | 3.07975300  | -1.84187100 |
| C | 2.26003100  | 5.12198200  | 1.98553100  | H  | -4.89128900 | 3.81499600  | -2.22520600 |
| H | 2.31854200  | 6.03122300  | 2.57852300  | C  | -1.37651500 | 3.42575000  | 3.30386500  |
| C | 3.08923400  | 4.04250900  | 2.28237700  | H  | -1.47595200 | 4.22440900  | 4.03360900  |
| H | 3.79220700  | 4.10668000  | 3.10899800  | C  | 3.40754800  | -3.47358000 | -2.37366200 |
| C | -2.68280400 | -2.37396600 | 0.00256100  | H  | 4.15461300  | -3.37335400 | -3.15686000 |
| C | -3.56103800 | 3.25853900  | -0.62695700 | C  | 4.25102500  | -1.46160900 | 2.43738500  |
| C | -0.37310300 | -2.40678100 | -3.52860600 | H  | 4.77597400  | -0.89449100 | 1.67351300  |
| H | 0.25793600  | -2.33515400 | -4.40740500 | C  | 4.22228700  | -2.59197600 | 4.56863300  |
| C | -3.01255900 | 0.96102300  | -2.06957000 | H  | 4.73985200  | -2.91931800 | 5.46664300  |
| H | -2.83449800 | 0.07838200  | -2.67388100 | C  | 3.22057200  | -2.44136700 | -1.45758300 |
| C | -0.44037700 | 1.35507800  | 2.58480400  | H  | 3.80678900  | -1.52883700 | -1.52559800 |
| H | 0.18884400  | 0.47813600  | 2.69537900  | C  | 4.91221400  | -1.88280400 | 3.58688000  |
| C | 1.67383700  | -4.75385000 | -1.28611600 | H  | 5.96649600  | -1.65451700 | 3.71996200  |
| H | 1.06568800  | -5.65231400 | -1.22272000 | C  | 3.17921900  | 2.44804100  | -4.31434000 |
| C | -4.04194400 | -1.94703500 | 2.37883100  | H  | 2.69684200  | 2.84049600  | -5.20572100 |
| C | -1.24488200 | -3.47448300 | -3.33364000 | F  | -4.50485600 | 1.71861400  | -3.71826900 |
| H | -1.31992500 | -4.26814700 | -4.07180200 | F  | -3.84873100 | 4.38861000  | 0.04804700  |
| C | 2.25839400  | -2.56039200 | -0.45140500 | F  | -4.70350700 | -1.74538900 | 3.52614700  |
| C | -4.31319500 | -3.10729400 | 1.66537400  | F  | -3.88551600 | -4.41828900 | -0.20650800 |
| H | -5.03575200 | -3.83573400 | 2.01217600  | Ir | -1.02398700 | -0.02918300 | -0.00402200 |

|   |             |             |             |   |             |             |             |
|---|-------------|-------------|-------------|---|-------------|-------------|-------------|
| C | -3.62089300 | -3.29184000 | 0.48387500  | N | -1.06839400 | -1.46580200 | -1.45055800 |
| C | 2.86884700  | -2.87638700 | 4.40228200  | N | -1.13347600 | 1.40752400  | 1.43903200  |
| H | 2.32799400  | -3.42155200 | 5.17135300  | N | 2.74983600  | 0.10293900  | 0.24452100  |
| C | 2.41850200  | 2.16061400  | -3.18407300 | C | -0.53273900 | 2.34566700  | 3.54741900  |
| H | 1.34297000  | 2.31603200  | -3.18653500 | H | 0.04937700  | 2.26742600  | 4.45894100  |
| C | 4.41336000  | 1.42936300  | -2.03226500 | O | 0.52139400  | -1.17183400 | 1.12904000  |
| H | 4.88385200  | 1.01926100  | -1.14231200 | O | 0.58621100  | 1.09962400  | -1.06105700 |
| C | -0.31585600 | -1.42075800 | -2.55860900 | P | 2.01665900  | -1.22799600 | 0.76566700  |
| H | 0.33333700  | -0.55462300 | -2.63319800 | P | 2.03082300  | 1.29092500  | -0.56472700 |
